# Supplementary material
Source: MDPI journal article supplement (https://www.mdpi.com/2297-8747/26/2/40)
Supplement: s1 [file s1]

Archive with 2 entries (2 files):
- Supplement 1.pdf
- Supplement 2.pdf
