# Supplementary material
Source: MDPI journal article supplement (https://www.mdpi.com/2297-8747/26/2/40)
Supplement: s1 [file s1 › Supplement 2.pdf]

## Supplementary File 2: Supplementary Figures and Tables

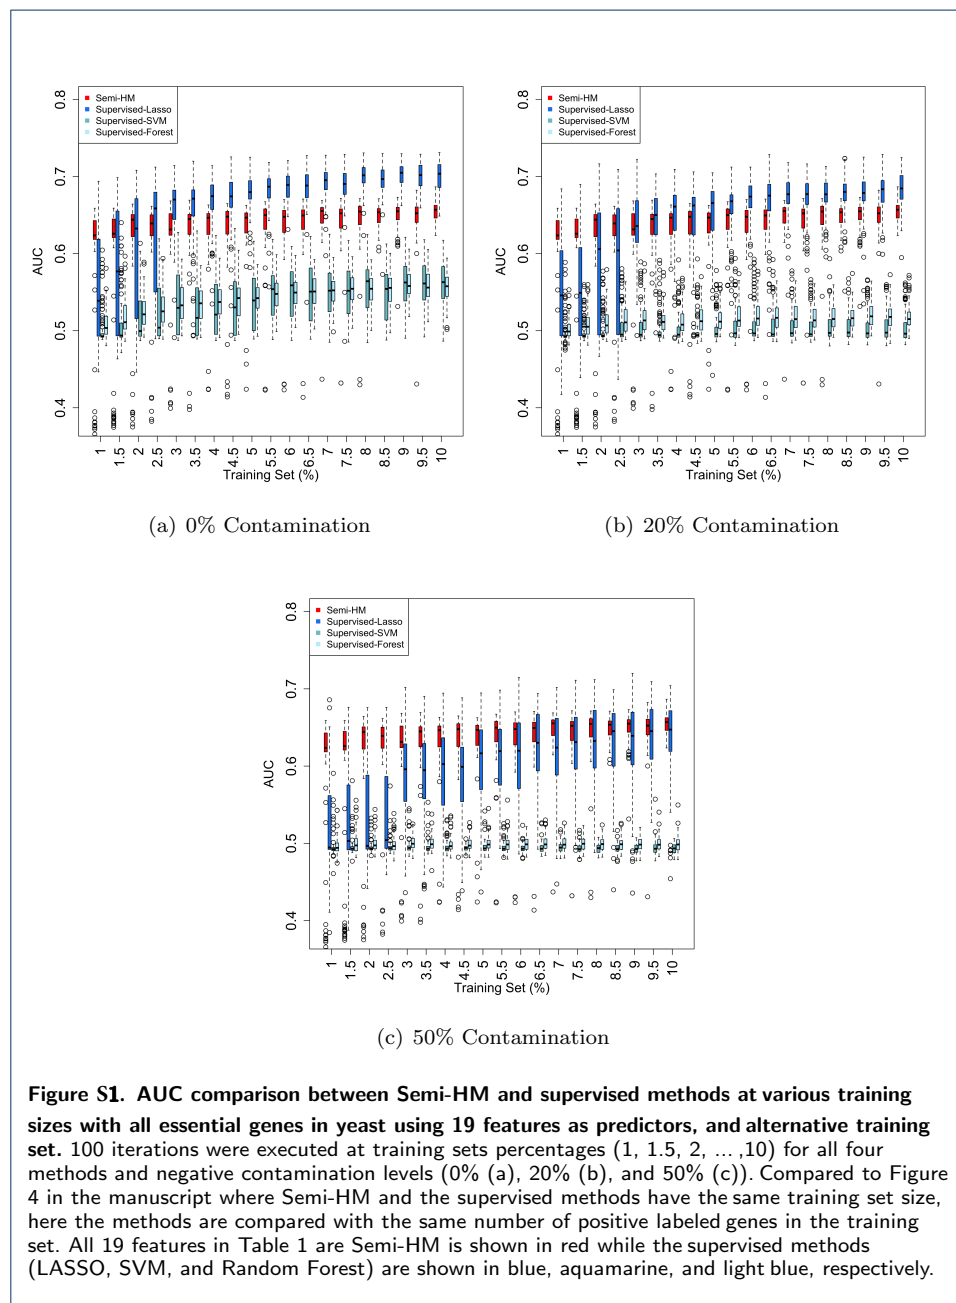

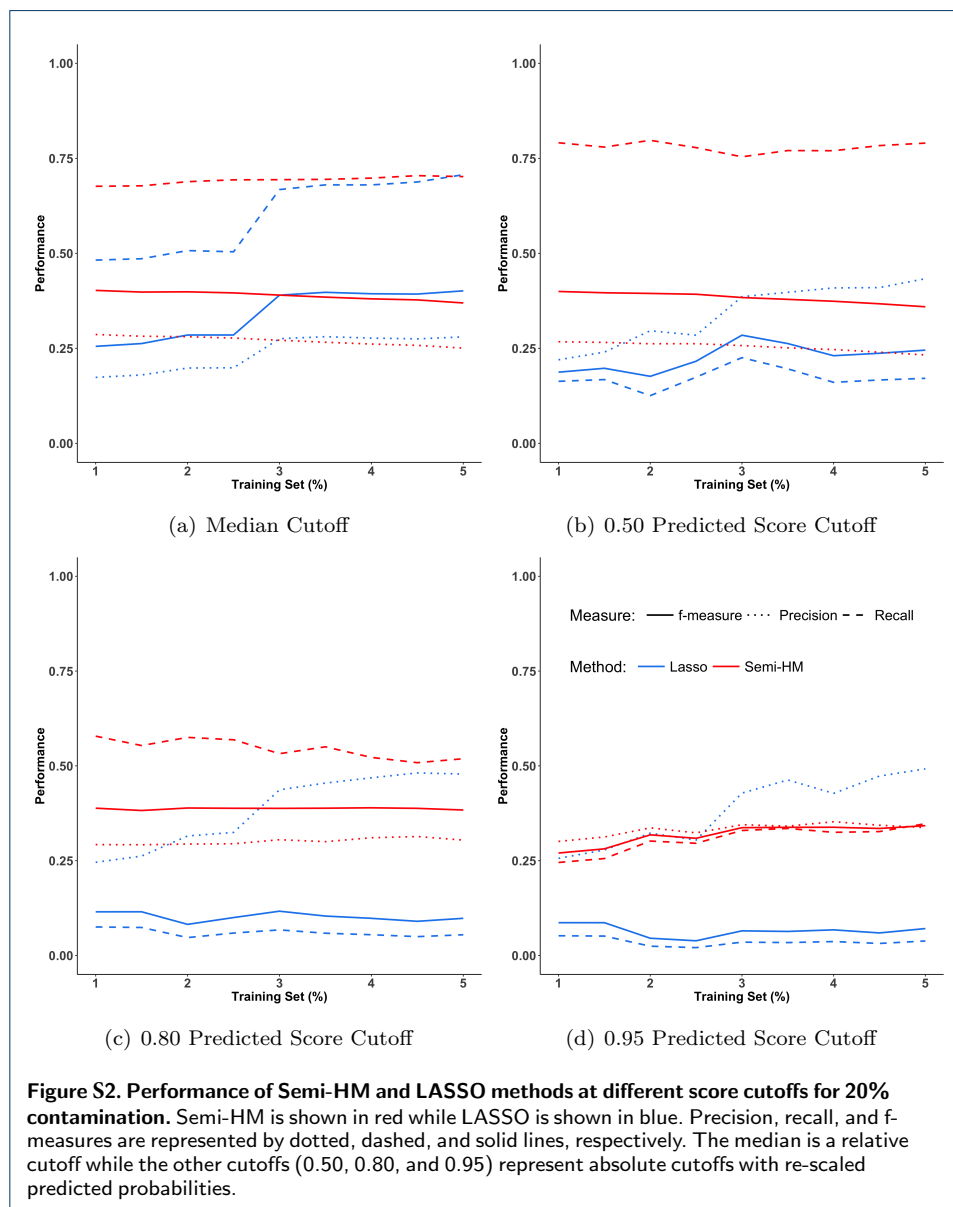

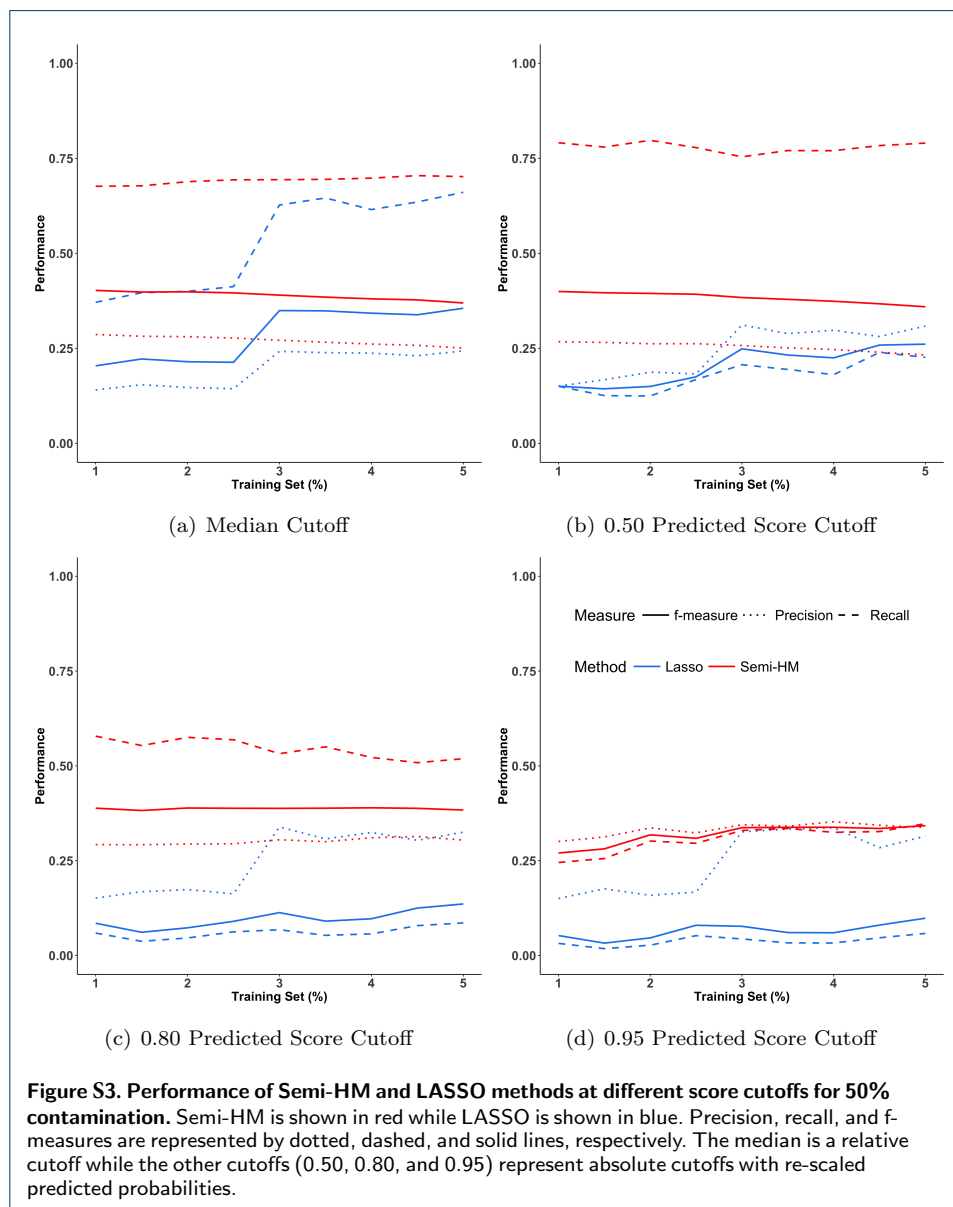

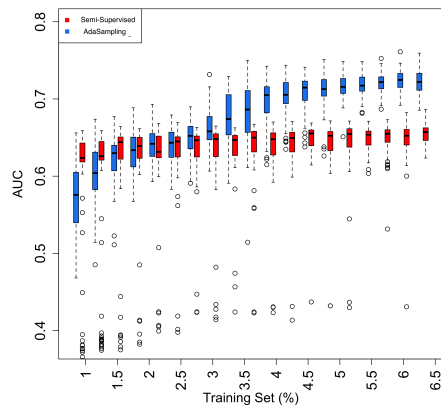

**Figure S4. AUC comparison between Semi-HM compared to AdaSampling at various training sizes.** 100 iterations were executed at training sets percentages (1, 1.5, 2, ... ,10) for both methods, using the 19 features described in the text. Semi-HM is shown in red while AdaSampling (using the logistic method) is shown in blue. Results are for the case with 600 additional randomly selected genes were considered unlabeled for training.

| PANTHER GO-Slim Biological Process                                       | Ref  | Obs | Exp    | FC    | FDR      |
|--------------------------------------------------------------------------|------|-----|--------|-------|----------|
| RNA metabolic process (GO:0016070)                                       | 550  | 101 | 16.12  | 6.27  | 7.24E-51 |
| nucleobase-containing compound metabolic process (GO:0006139)            | 1025 | 117 | 30.04  | 3.89  | 1.11E-41 |
| nitrogen compound metabolic process (GO:0006807)                         | 1102 | 109 | 32.3   | 3.38  | 2.01E-32 |
| primary metabolic process (GO:0044238)                                   | 1787 | 128 | 52.37  | 2.44  | 1.11E-26 |
| metabolic process (GO:0008152)                                           | 2118 | 136 | 62.07  | 2.19  | 9.76E-25 |
| mRNA processing (GO:0006397)                                             | 108  | 35  | 3.17   | 11.06 | 2.29E-22 |
| transcription, DNA-dependent (GO:0006351)                                | 225  | 45  | 6.59   | 6.82  | 1.02E-21 |
| transcription from RNA polymerase II promoter (GO:0006366)               | 160  | 37  | 4.69   | 7.89  | 1.59E-19 |
| Unclassified (UNCLASSIFIED)                                              | 3804 | 48  | 111.48 | 0.43  | 3.25E-18 |
| cellular process (GO:0009987)                                            | 2424 | 129 | 71.04  | 1.82  | 3.03E-15 |
| RNA splicing, via transesterification reactions (GO:0000375)             | 72   | 22  | 2.11   | 10.43 | 1.17E-13 |
| mRNA splicing, via spliceosome (GO:0000398)                              | 72   | 22  | 2.11   | 10.43 | 1.27E-13 |
| regulation of transcription from RNA polymerase II promoter (GO:0006357) | 105  | 23  | 3.08   | 7.47  | 1.06E-11 |
| biosynthetic process (GO:0009058)                                        | 819  | 61  | 24     | 2.54  | 1.07E-10 |
| DNA metabolic process (GO:0006259)                                       | 168  | 26  | 4.92   | 5.28  | 3.03E-10 |
| cellular component biogenesis (GO:0044085)                               | 433  | 38  | 12.69  | 2.99  | 2.98E-08 |
| DNA replication (GO:0006260)                                             | 67   | 14  | 1.96   | 7.13  | 5.00E-07 |
| mRNA polyadenylation (GO:0006378)                                        | 14   | 8   | 0.41   | 19.5  | 8.13E-07 |
| mRNA 3'-end processing (GO:0031124)                                      | 22   | 9   | 0.64   | 13.96 | 1.09E-06 |
| DNA repair (GO:0006281)                                                  | 96   | 15  | 2.81   | 5.33  | 4.06E-06 |
| transcription initiation from RNA polymerase II promoter (GO:0006367)    | 23   | 8   | 0.67   | 11.87 | 1.38E-05 |
| rRNA metabolic process (GO:0016072)                                      | 110  | 15  | 3.22   | 4.65  | 1.66E-05 |
| cellular component organization or biogenesis (GO:0071840)               | 831  | 49  | 24.35  | 2.01  | 1.66E-05 |
| chromatin organization (GO:0006325)                                      | 96   | 12  | 2.81   | 4.27  | 3.69E-04 |
| protein acetylation (GO:0006473)                                         | 29   | 7   | 0.85   | 8.24  | 3.88E-04 |
| transcription elongation from RNA polymerase II promoter (GO:0006368)    | 20   | 6   | 0.59   | 10.24 | 4.67E-04 |

**Table S1. Panther Enrichment Analysis for True Positives.** Each row is a significant Panther pathway from the GO-Slim Biological Process category. Only pathways with fold change (FC) > 2 and false discovery rate (FDR) < 1.00E-05 are displayed. Column Ref indicates the number of genes in the pathway in the reference genome, Obs is the observed number of genes in this pathway for the gene list, and Exp is the expected number of genes in this pathway for the gene list based on the frequency in the genome.

| PANTHER GO-Slim Biological Process           | Ref | Obs | Exp   | FC   | FDR      |
|----------------------------------------------|-----|-----|-------|------|----------|
| RNA metabolic process (GO:0016070)           | 550 | 96  | 40.5  | 2.37 | 1.47E-12 |
| protein localization (GO:0008104)            | 224 | 50  | 16.5  | 3.03 | 1.60E-09 |
| cellular component biogenesis (GO:0044085)   | 433 | 72  | 31.89 | 2.26 | 2.15E-08 |
| protein transport (GO:0015031)               | 272 | 52  | 20.03 | 2.6  | 8.82E-08 |
| intracellular protein transport (GO:0006886) | 261 | 50  | 19.22 | 2.6  | 1.68E-07 |
| protein targeting (GO:0006605)               | 110 | 29  | 8.1   | 3.58 | 5.46E-07 |
| tRNA metabolic process (GO:0006399)          | 80  | 23  | 5.89  | 3.9  | 3.37E-06 |
| cell cycle (GO:0007049)                      | 229 | 42  | 16.86 | 2.49 | 4.25E-06 |
| rRNA metabolic process (GO:0016072)          | 110 | 27  | 8.1   | 3.33 | 4.48E-06 |
| mitosis (GO:0007067)                         | 94  | 24  | 6.92  | 3.47 | 9.24E-06 |

**Table S2. Panther Enrichment Analysis for False Negatives.** Each row is a significant Panther pathway from the GO-Slim Biological Process category. Only pathways with fold change (FC) > 2 and false discovery rate (FDR) < 1.00E-05 are displayed. Column Ref indicates the number of genes in the pathway in the reference genome, Obs is the observed number of genes in this pathway for the gene list, and Exp is the expected number of genes in this pathway for the gene list based on the frequency in the genome.
